# Supplementary material for: Facile and scalable production of amorphous nickel borate for high performance hybrid supercapacitors
Source: Royal Society of Chemistry journal article supplement (doi:10.1039/c8ta07385f), 2018-01-01
Supplement: c8ta07385f1.pdf [file c8ta07385f1.pdf]

Facile scalable production of amorphous nickel borate for high performance *hybrid  
supercapacitors*

Wei Qin \*, Ying Liu, Xinyue Liu, Guowei Yang\*

State Key Laboratory of Optoelectronic Materials and Technologies, Nanotechnology  
Research Center, School of Materials Science and Engineering, School of Physics,  
Sun Yat-sen University, Guangzhou 510275, Guangdong, People's Republic of China

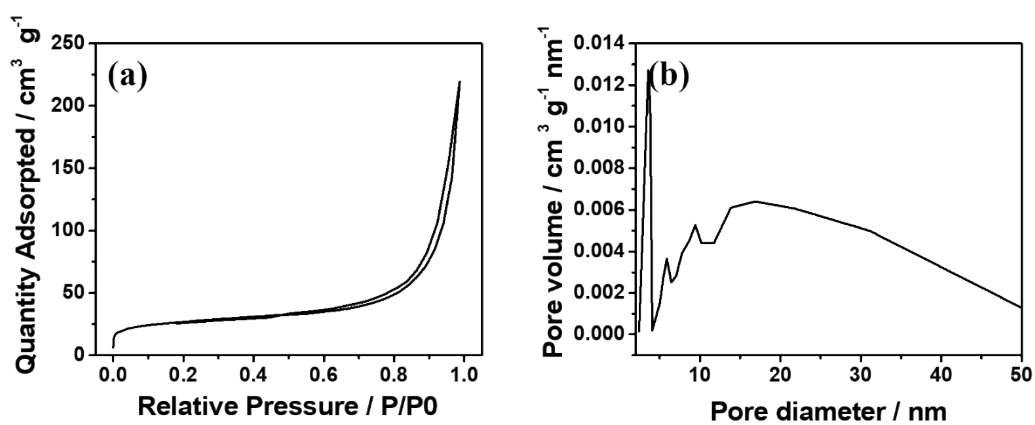

Figure S1 (a) N<sub>2</sub> adsorption-desorption isotherms and (b) pore size distribution  
amorphous NiB<sub>x</sub>O<sub>y</sub>

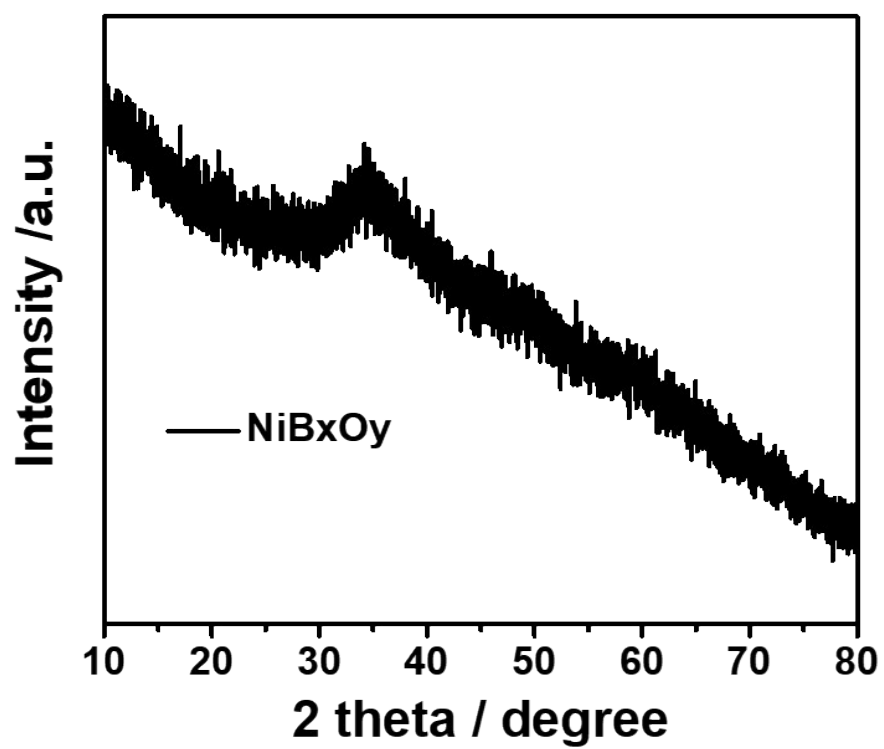

Figure S2 XRD pattern of NiB<sub>x</sub>O<sub>y</sub> nanosheet

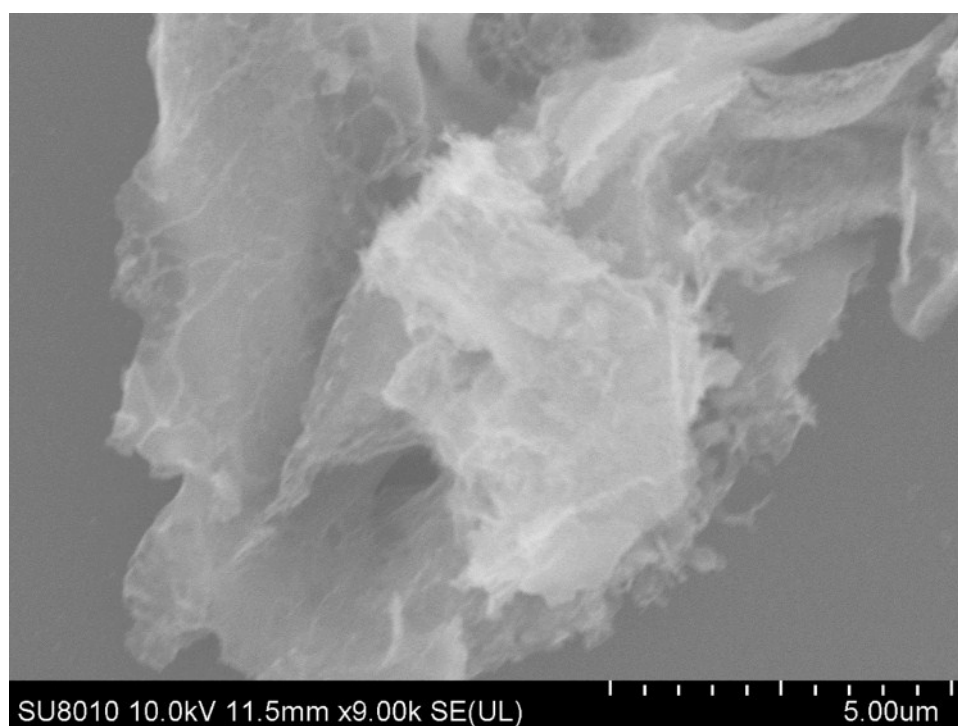

Figure S3 SEM of active carbon prepared by carbonize agaric

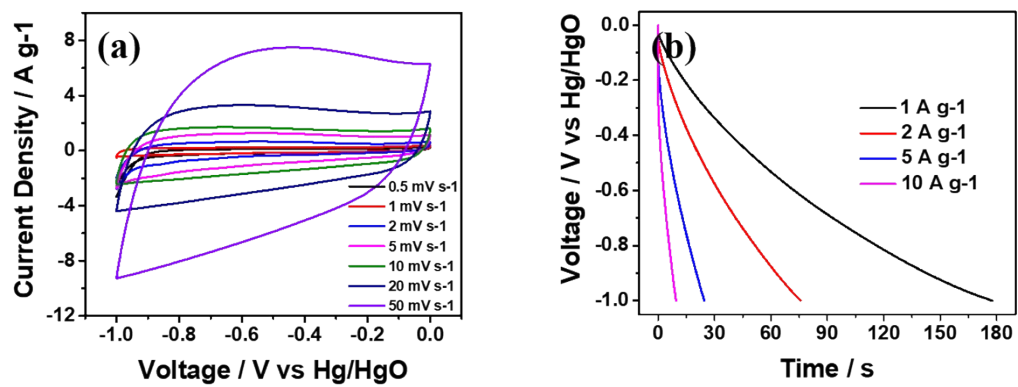

Figure S4 (a) CV curves of AC at different scan rates; (b) GCD curves of AC at different current densities

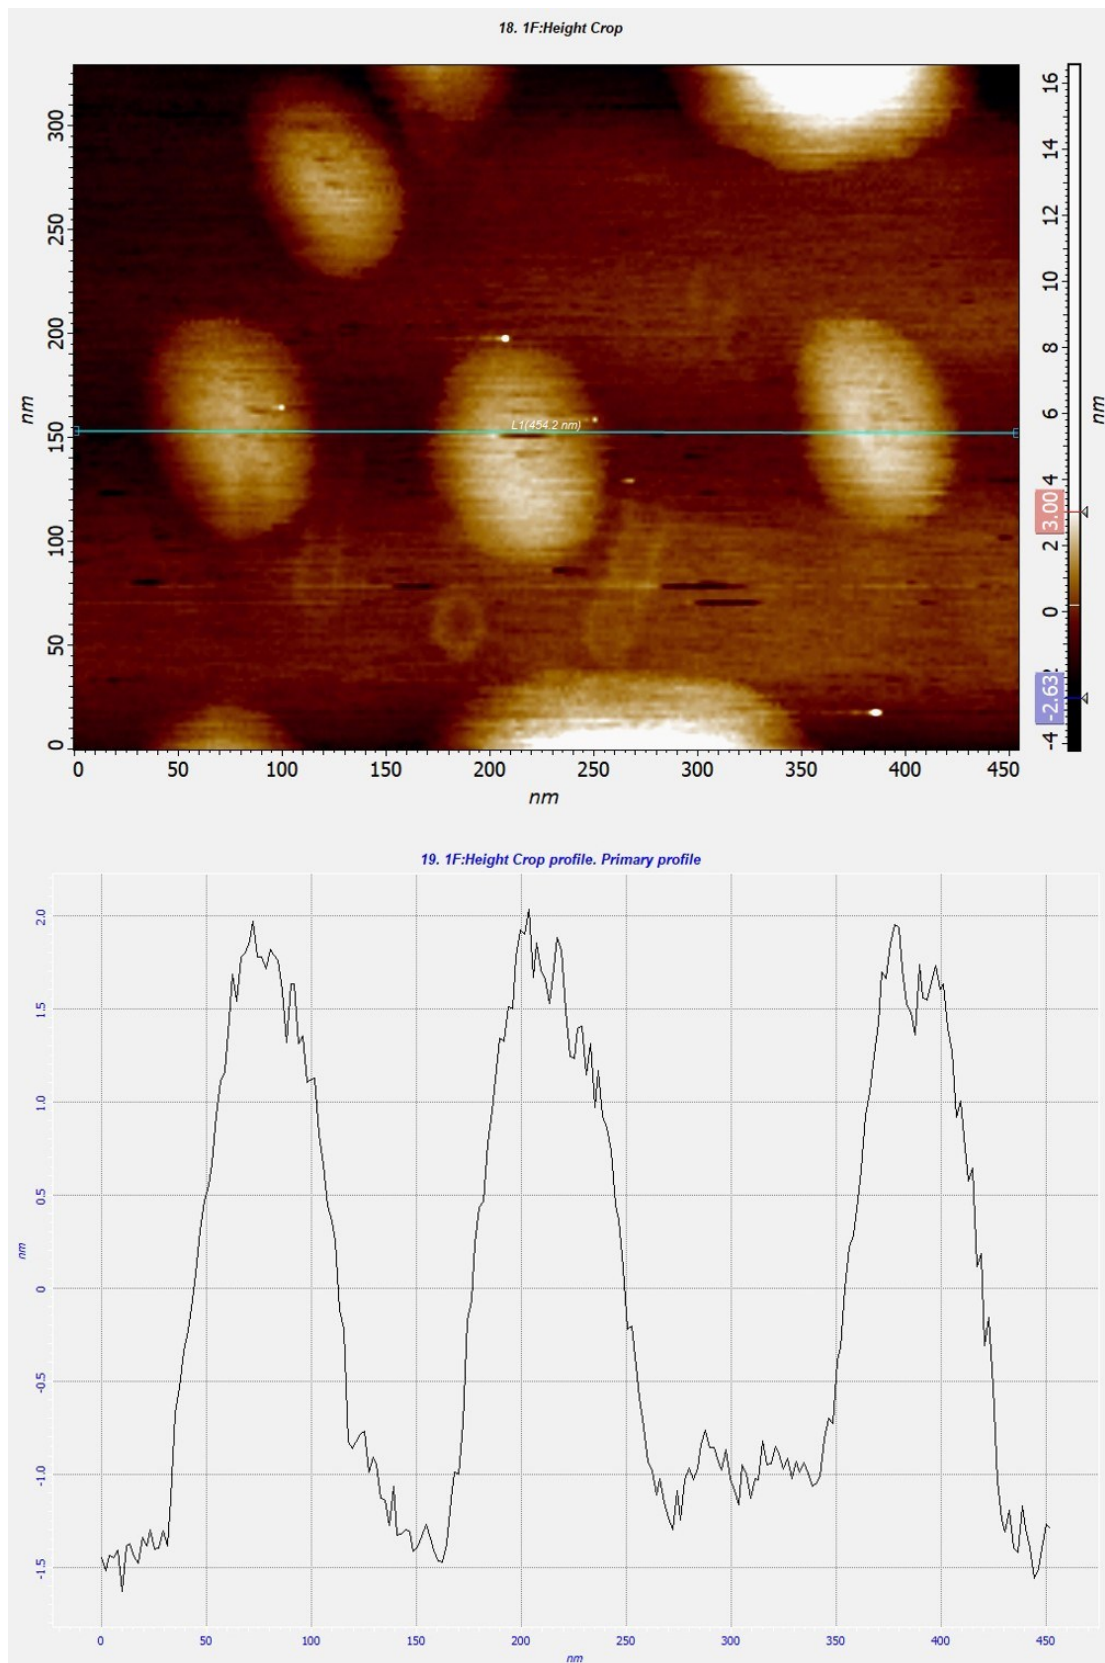

Figure S5 AFM image of  $\text{NiB}_x\text{O}_y$  in tapping mode: topography image and height profiles

Table S1 Atomic ratios determined by XPS

| Name  | Start BE | Peak<br>BE | End BE | Height<br>CPS | FWHM<br>eV | Area (P)<br>CPS.eV | Area (N)<br>TPP-2M | Atomic % |
|-------|----------|------------|--------|---------------|------------|--------------------|--------------------|----------|
| C 1s  | 293.71   | 284.8      | 279.81 | 33054.39      | 1.7        | 73548.3            | 1031.32            | 24.97    |
| O 1s  | 540.11   | 532.08     | 526.91 | 110851.07     | 2.58       | 309729.25          | 1797.06            | 43.51    |
| Ni 2p | 890.51   | 856.49     | 848.81 | 36353.9       | 2.9        | 318006.68          | 347.98             | 8.43     |
| B 1s  | 196.11   | 192.32     | 186.51 | 12549.32      | 1.78       | 25811.45           | 907.96             | 21.99    |
